# Supplementary material for: A global water scarcity assessment under Shared Socio-economic Pathways – Part 2: Water availability and scarcity
Source: Copernicus journal article supplement (doi:10.5194/hess-17-2393-2013), 2013-07-01
Supplement: Supplementary file [file hess-17-2393-2013-supplement.pdf]

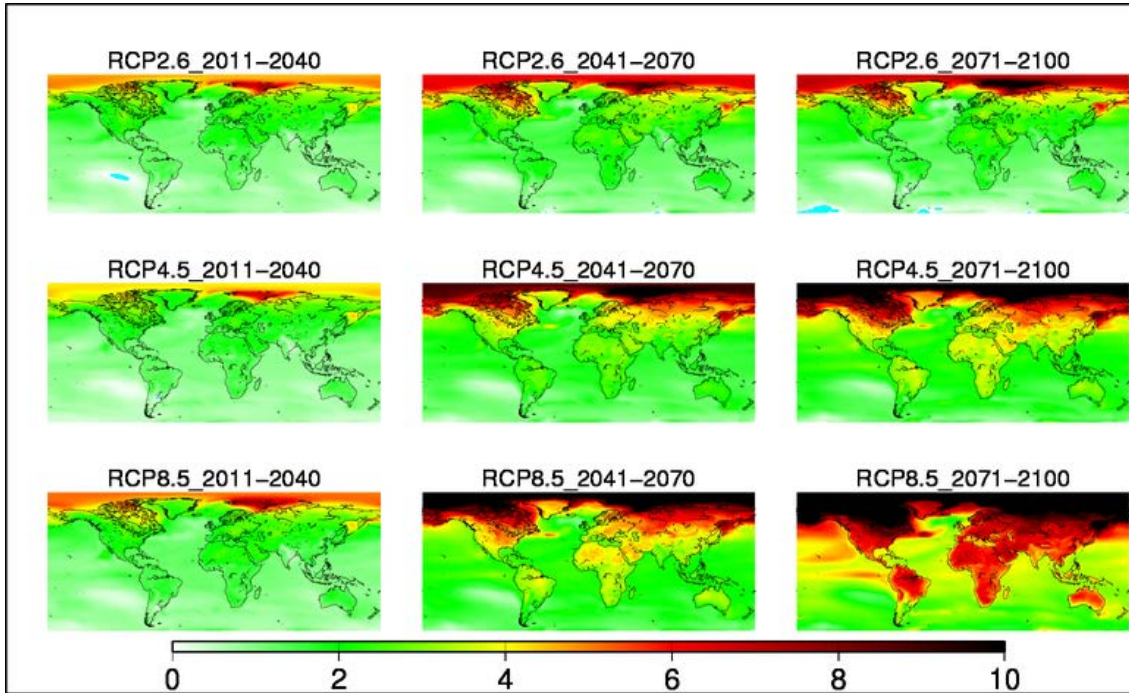

Figure S1 Figure 3 for the HadGEM model

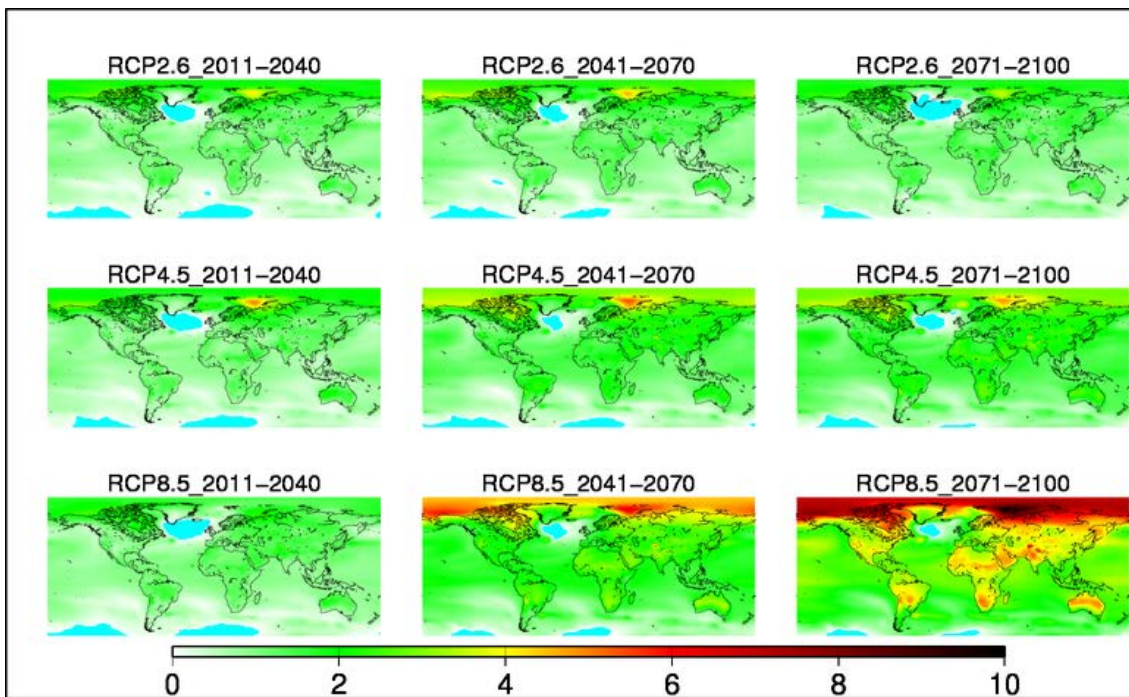

Figure S2 Figure 3 for the GFDL model

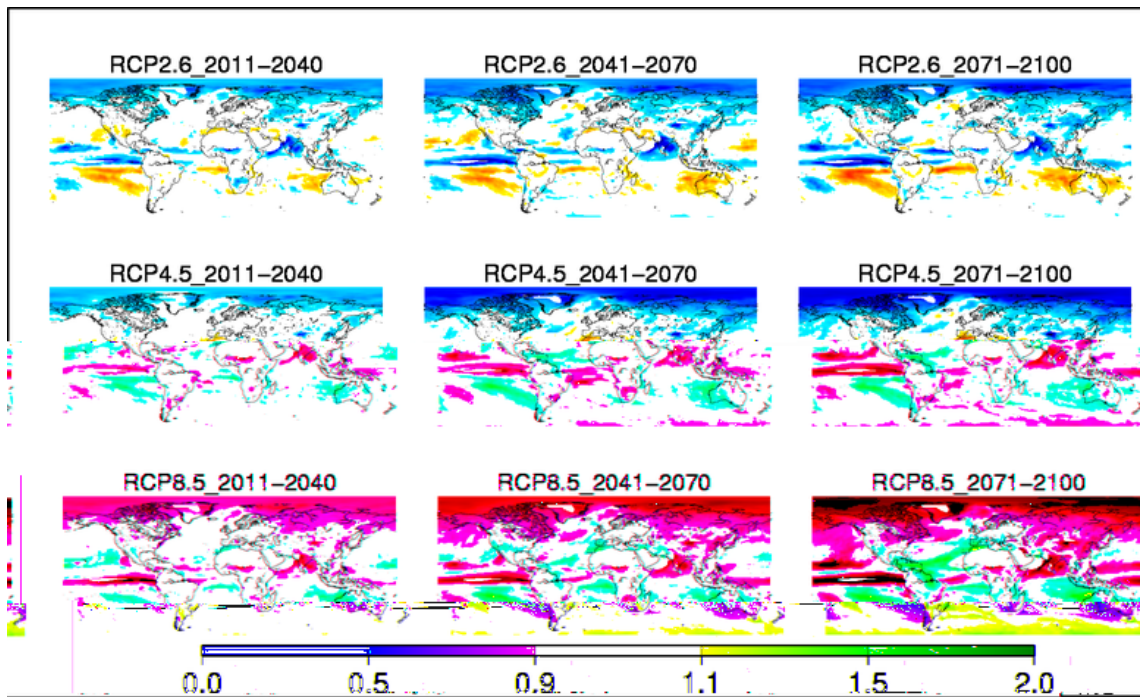

Figure S3 Figure 4 for the HadGEM model

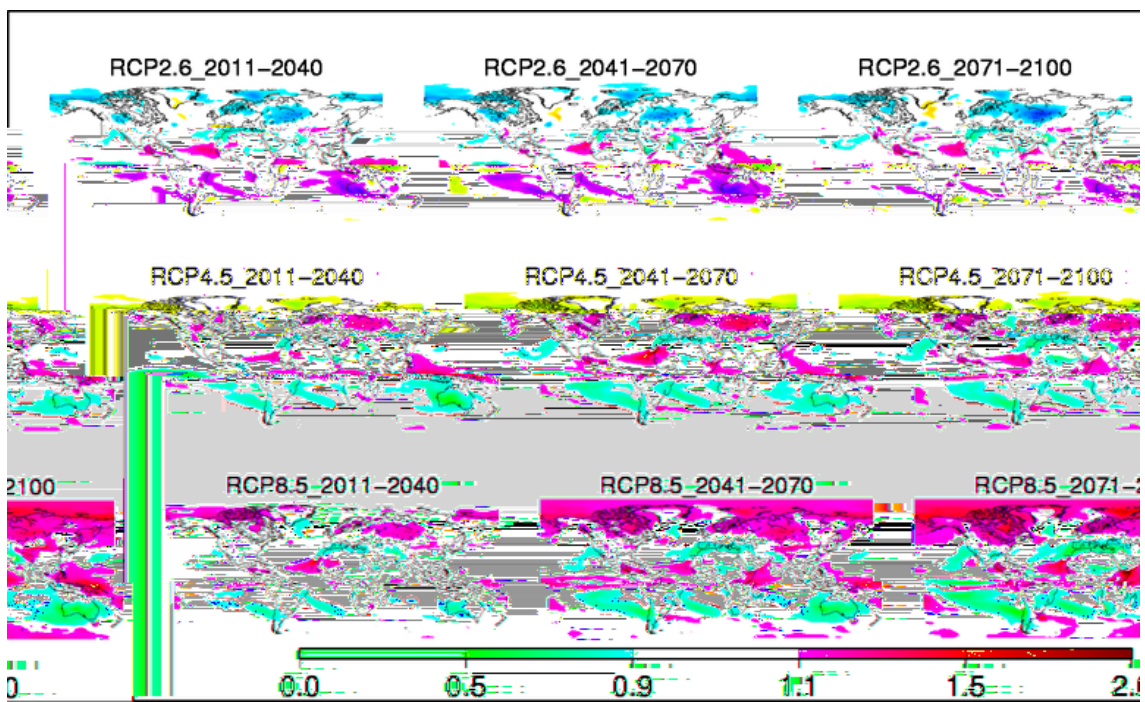

Figure S4 Figure 4 for the GFDL model

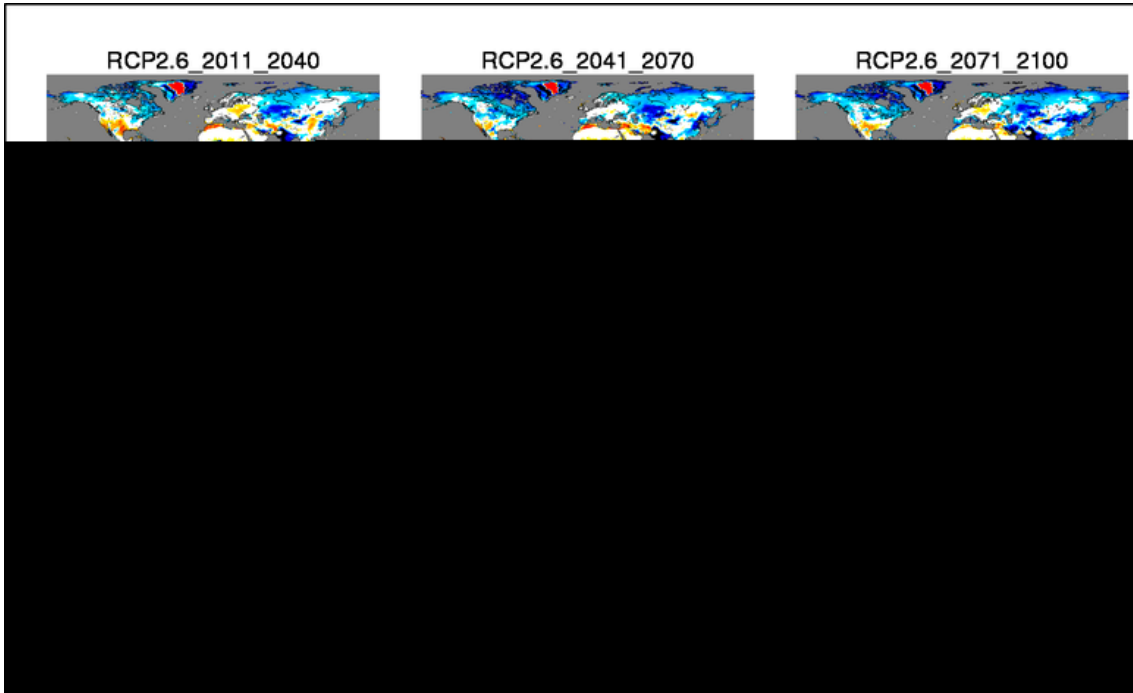

Figure S5 Figure 5 for the HadGEM model

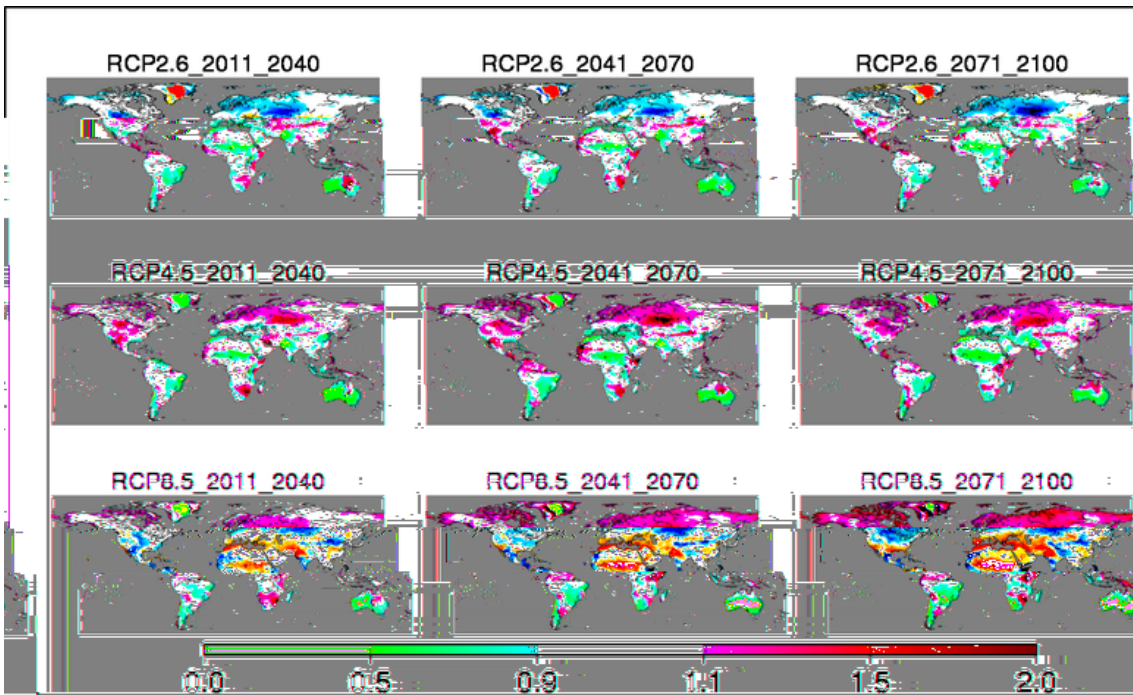

Figure S6 Figure 5 for the GFDL model

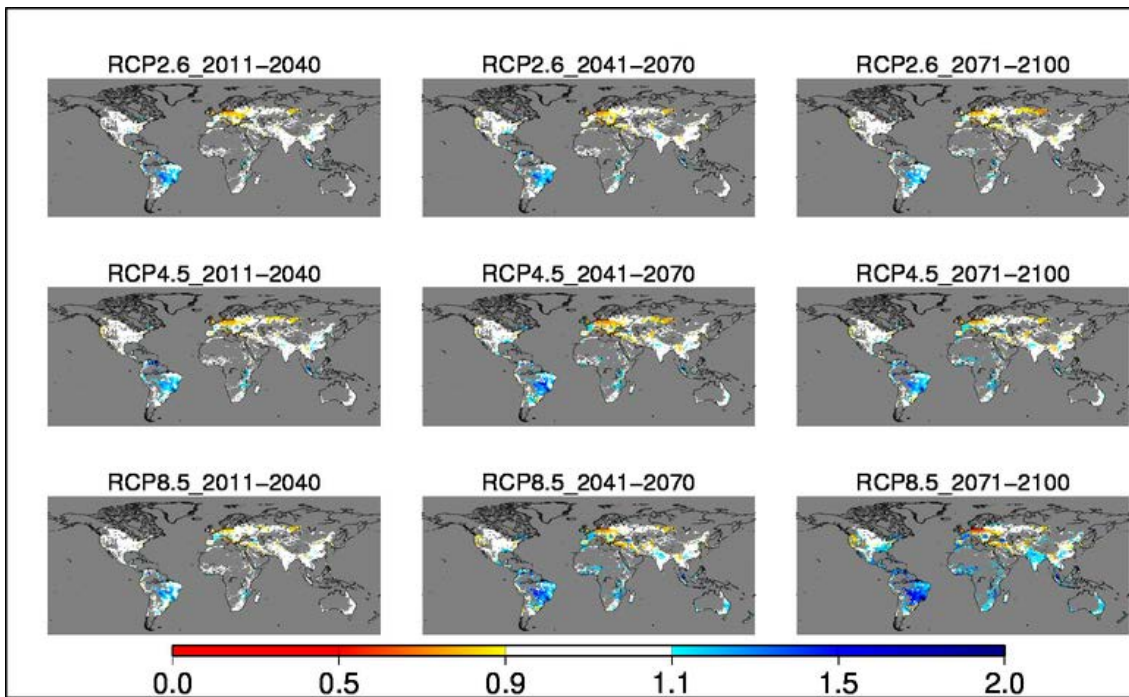

Figure S7 Figure 6 for the HadGEM model

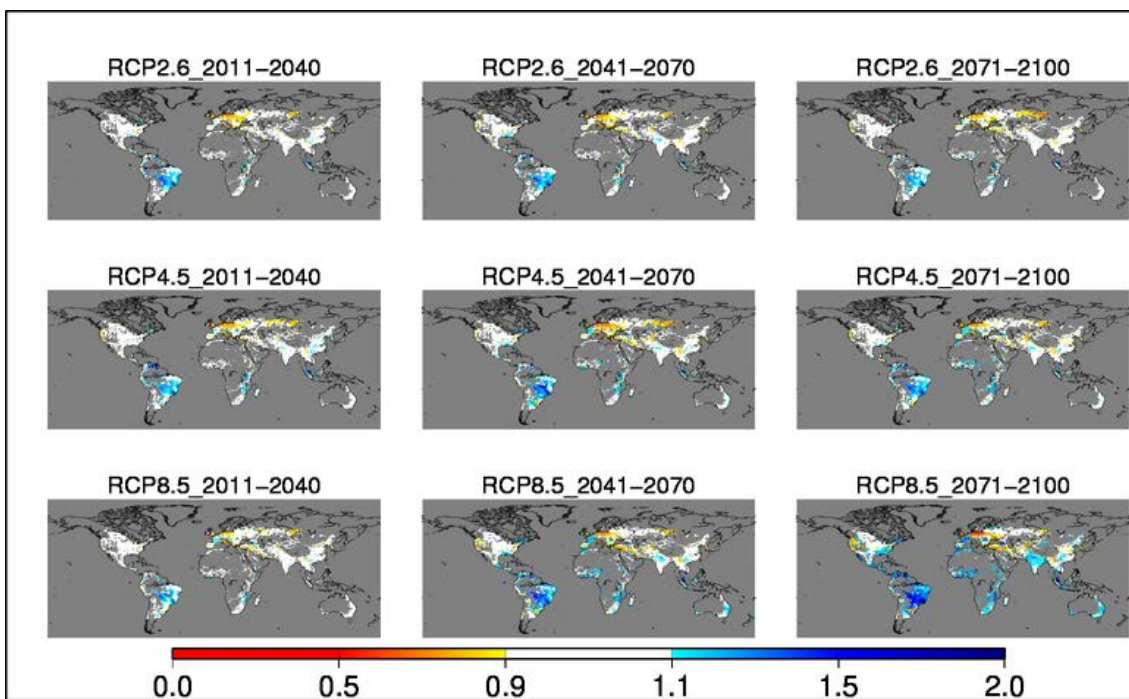

Figure S8 Figure 6 for the GFDL model

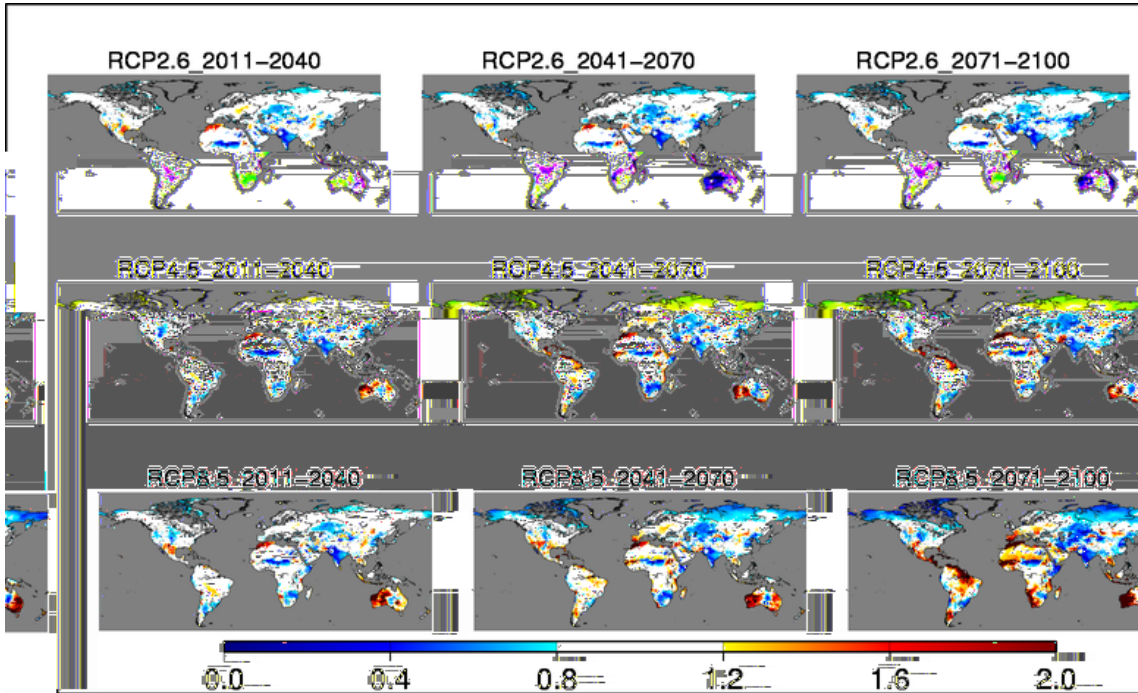

Figure S9 Figure 7 for the HadGEM model

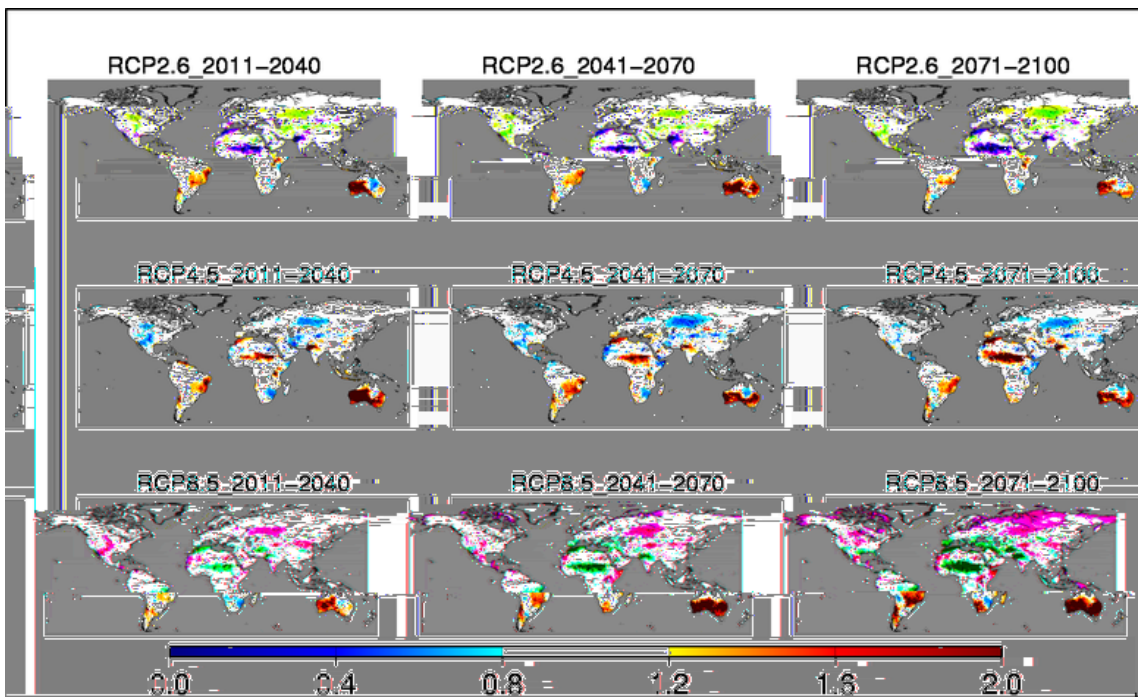

Figure S10 Figure 7 for the GFDL model

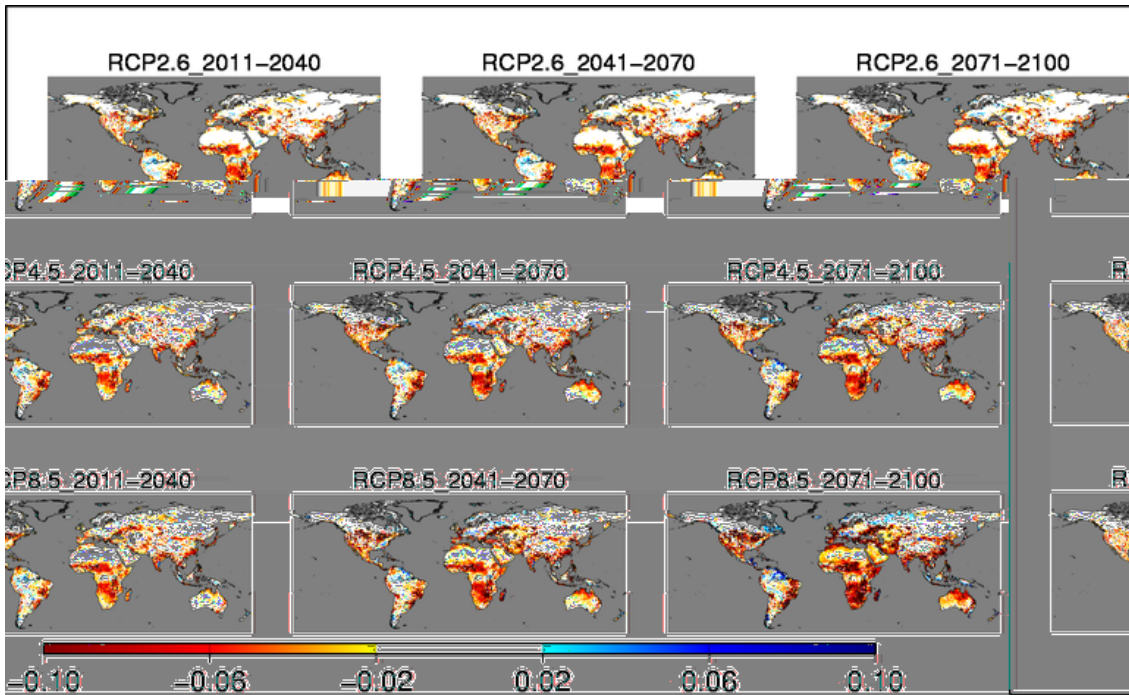

Figure S11 Figure 8 for the HadGEM model

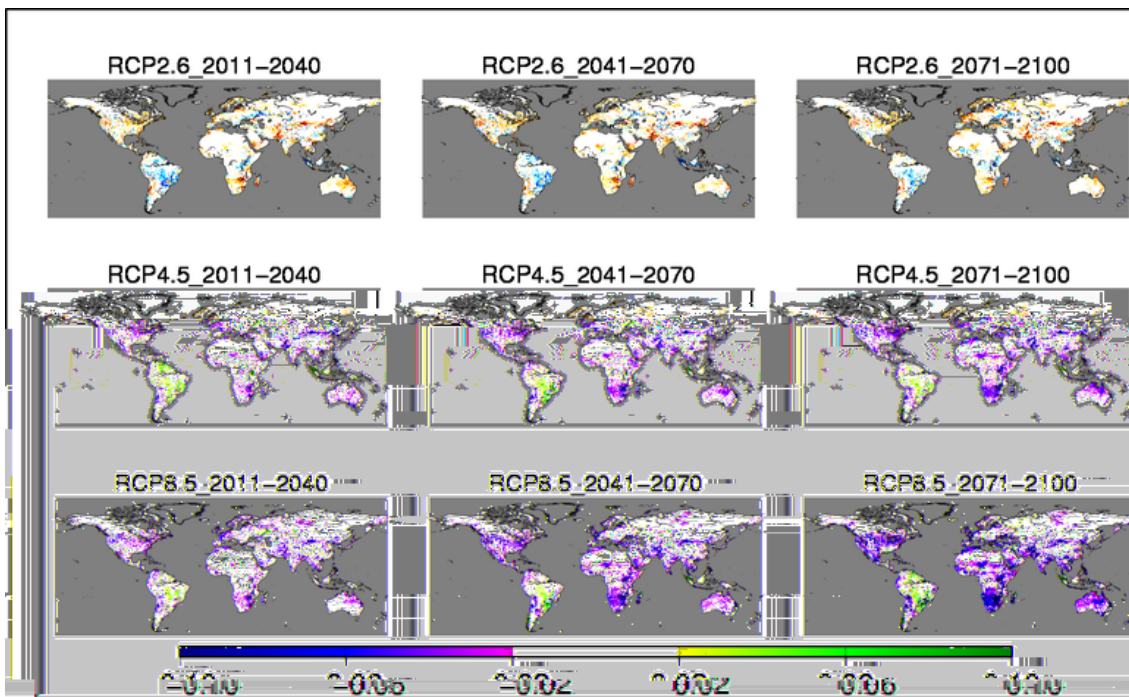

Figure S12 Figure 8 for the GFDL model

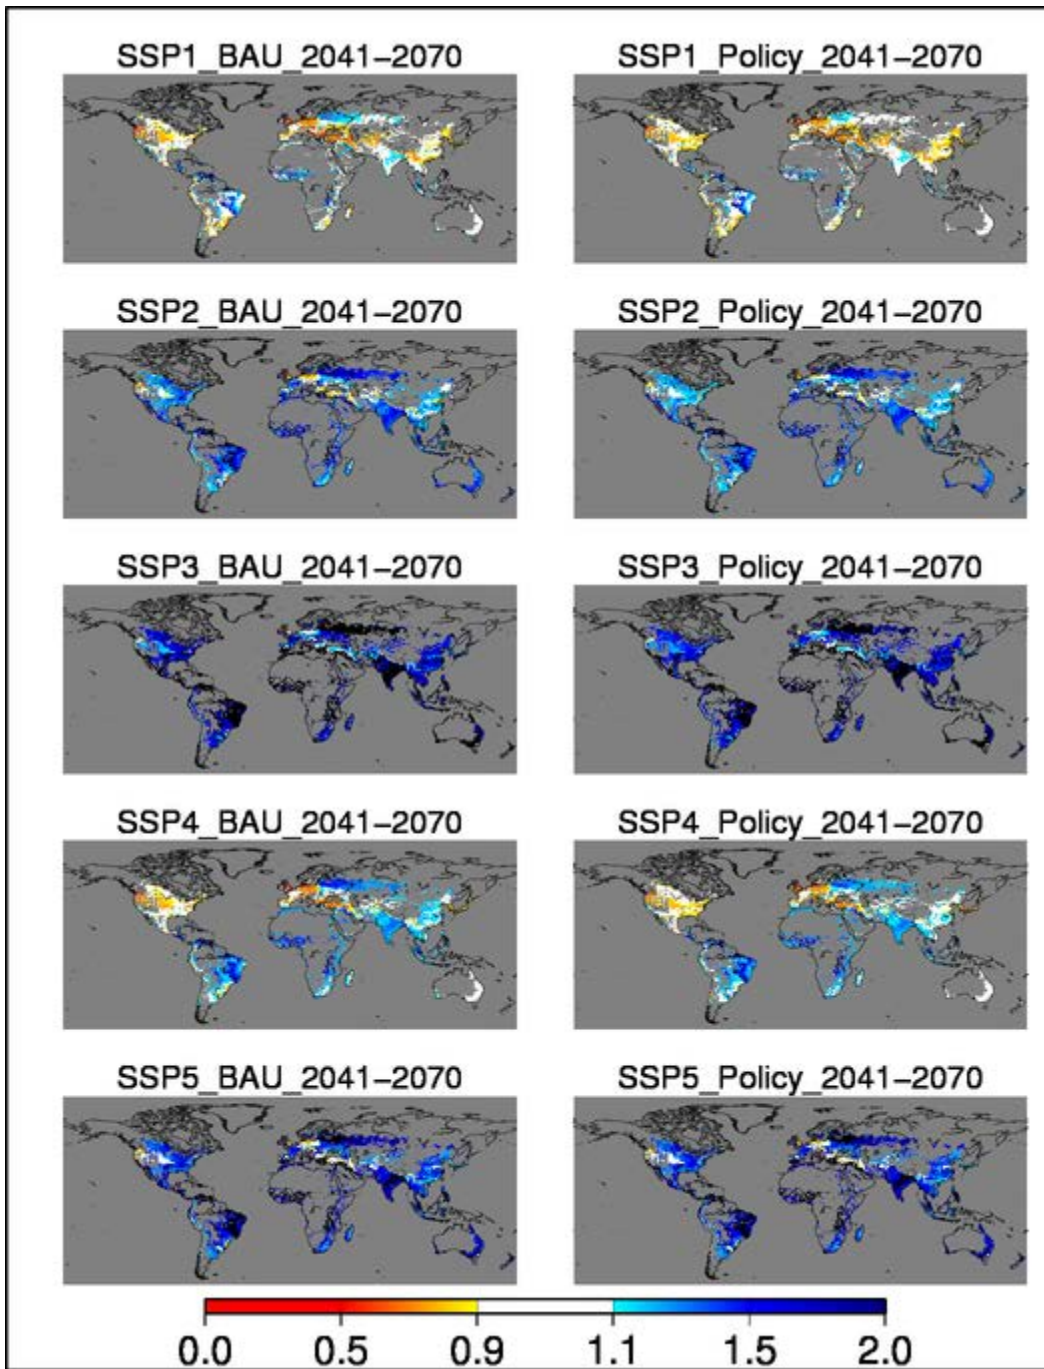

Figure S13 Figure 9 for the HadGEM model

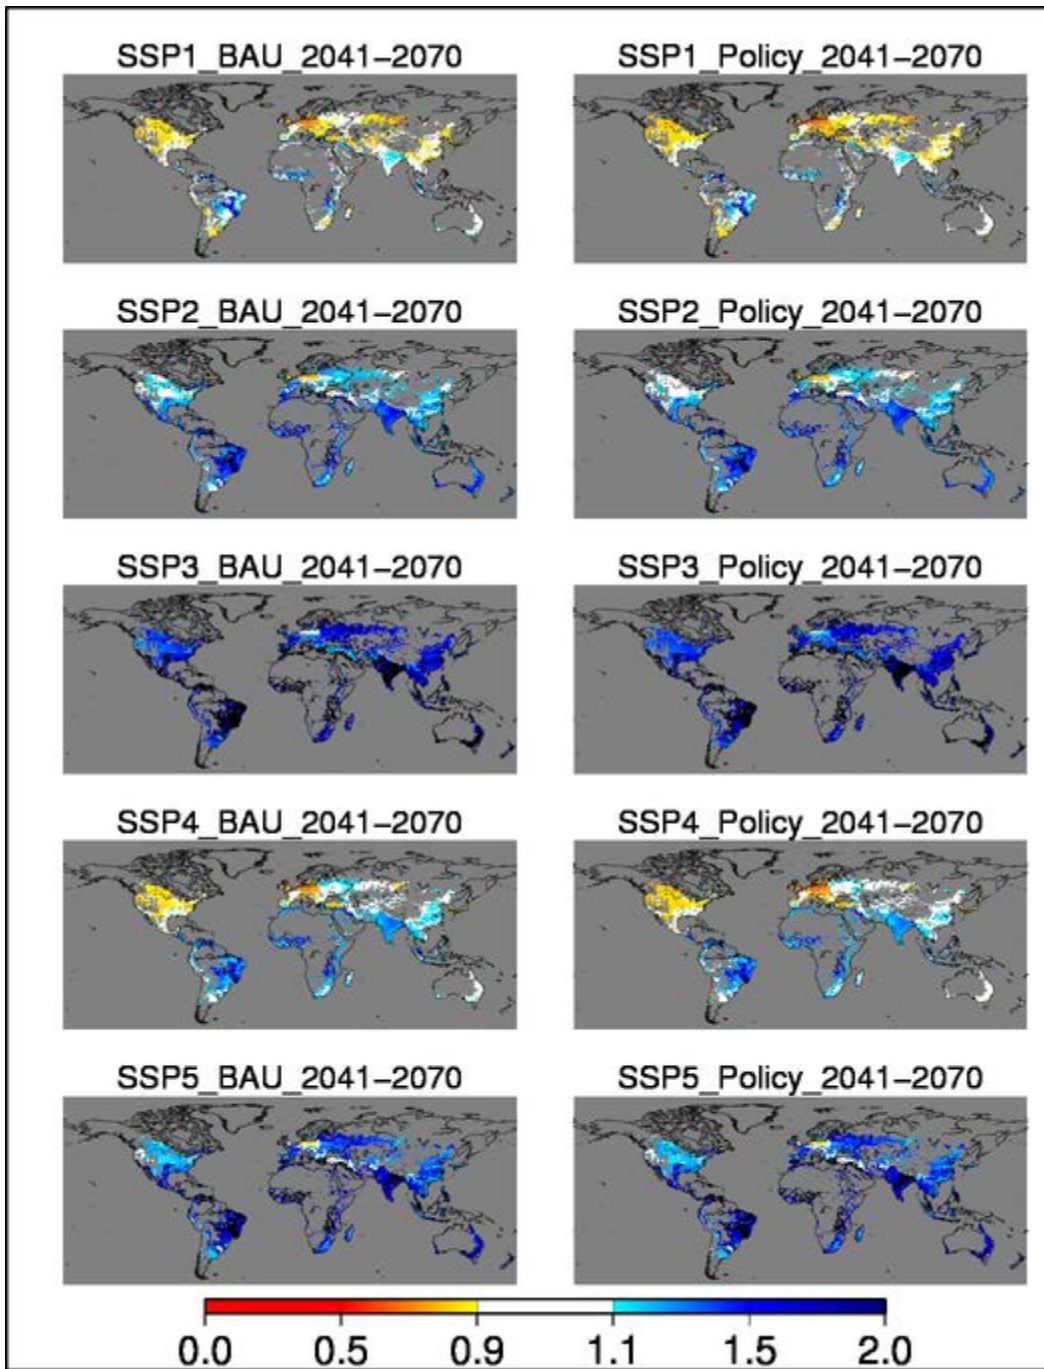

Figure S14 Figure 9 for the GFDL model



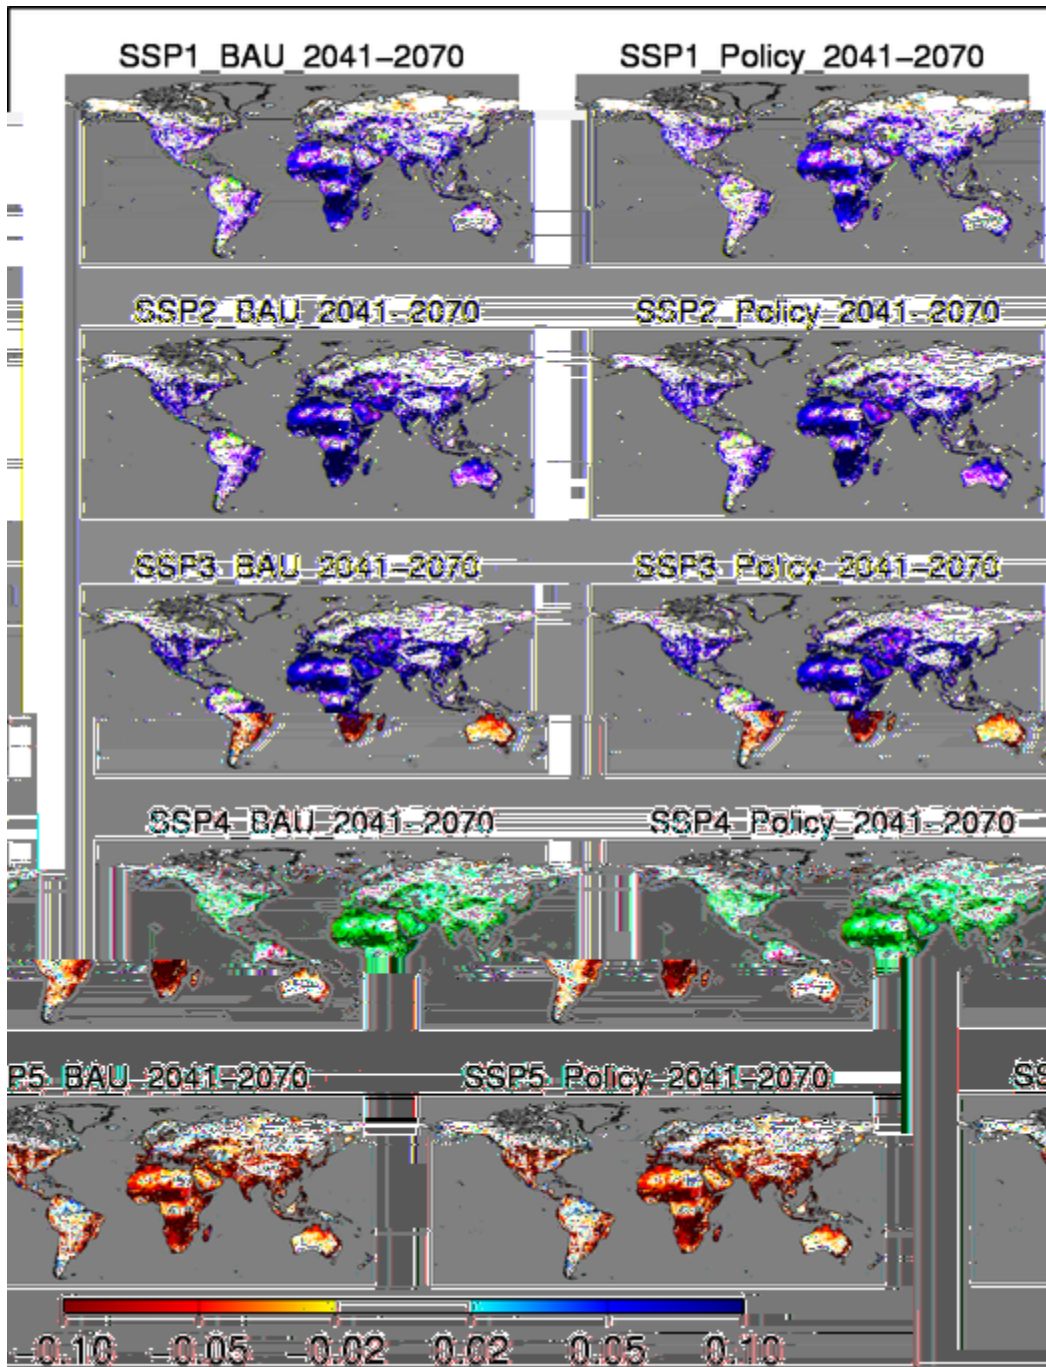

Figure S15 Figure 10 for the HadGEM model

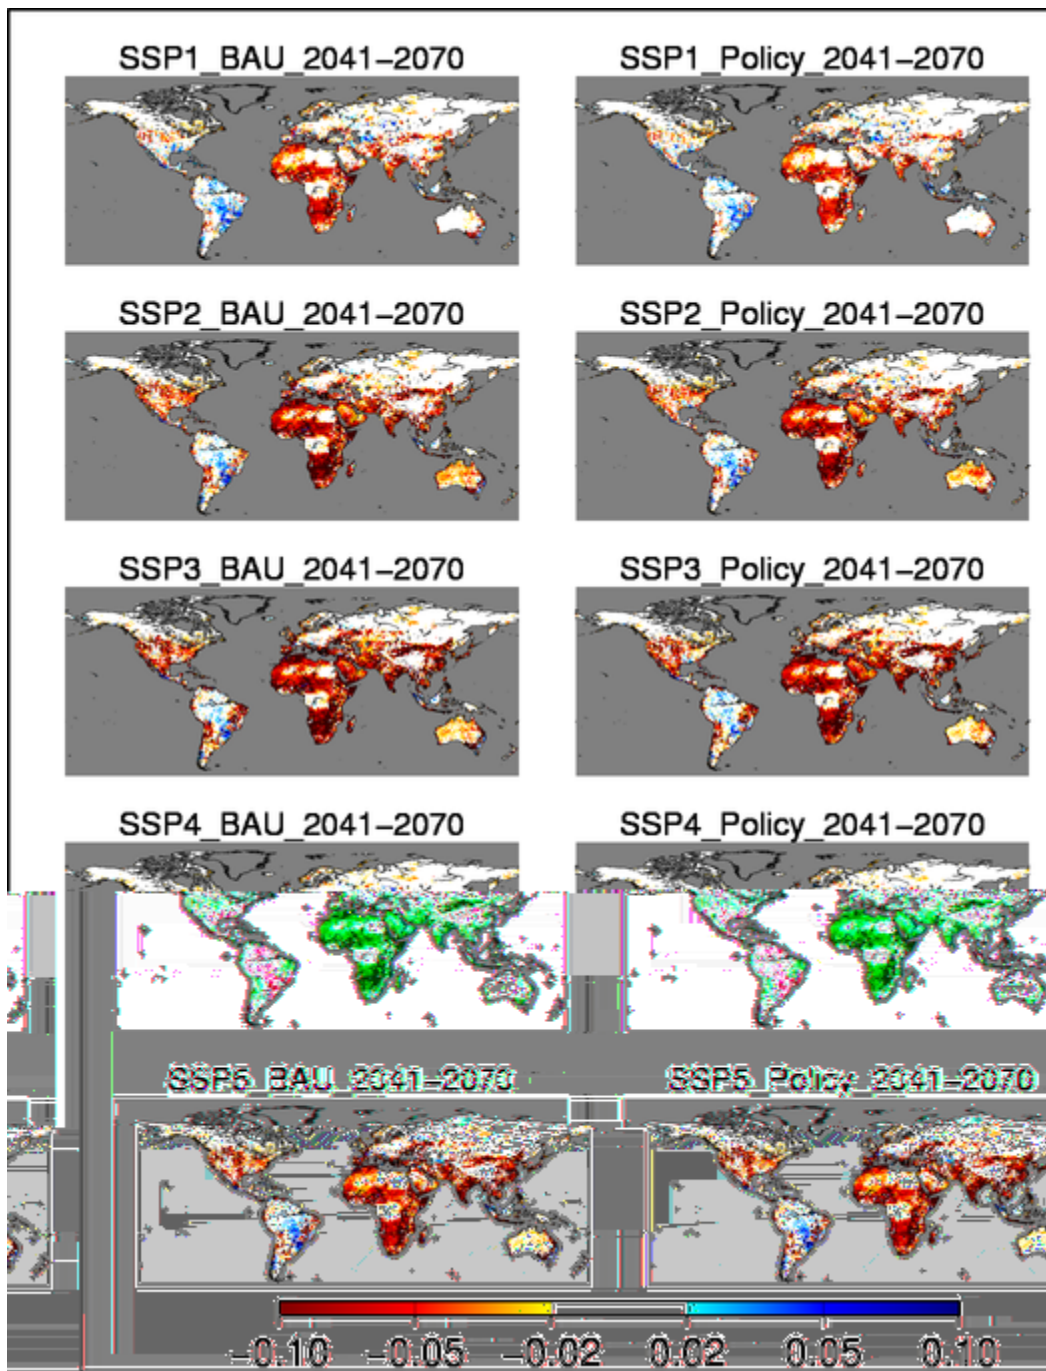

Figure S16 Figure 10 for the GFDL model

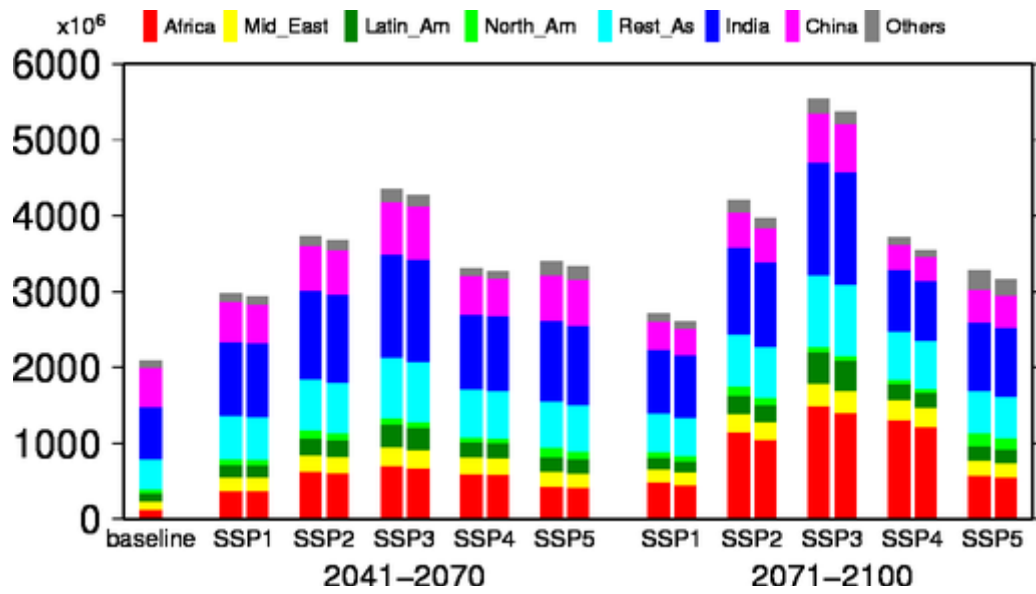

Figure S17 Figure 11 for the HadGEM model

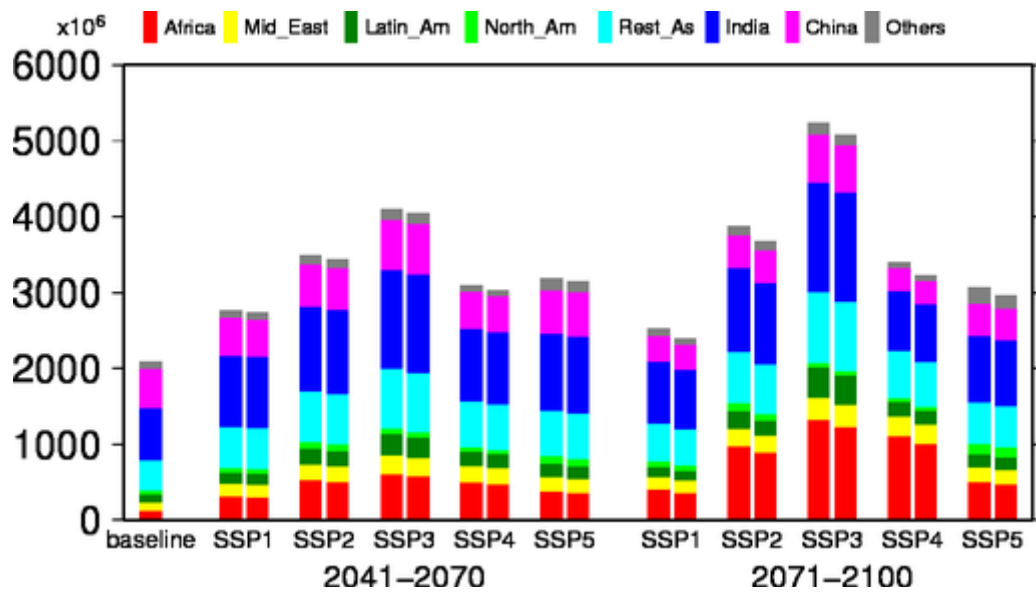

Figure S18 Figure 11 for the GFDL model

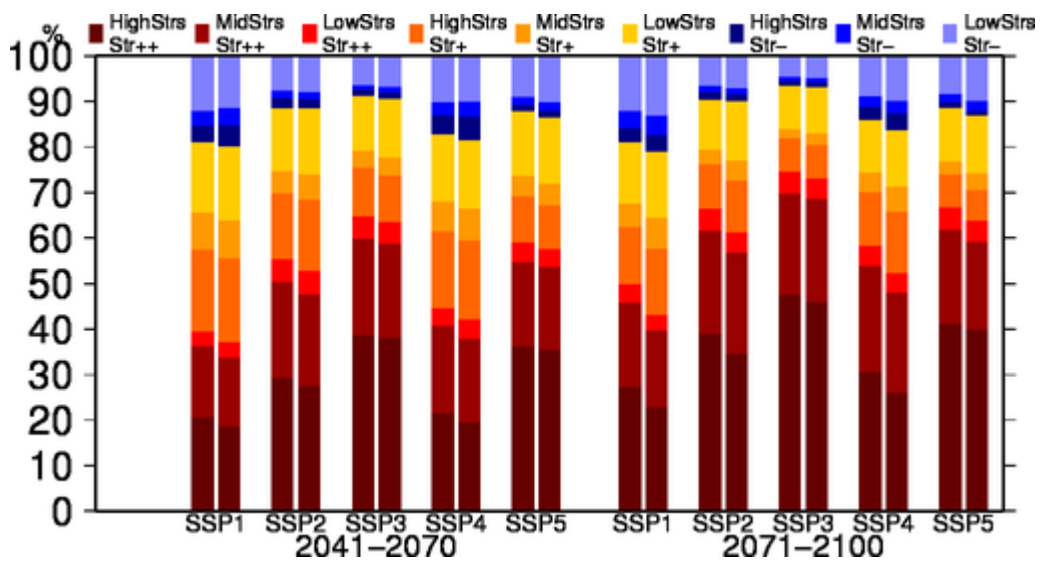

Figure S19 Figure 12 for the HadGEM model

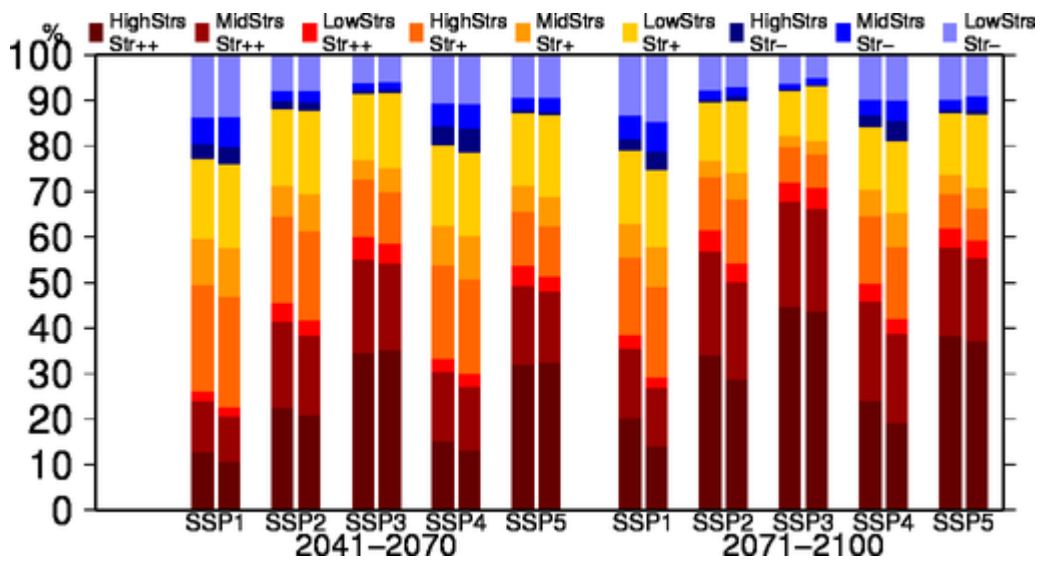

Figure S20 Figure 12 for the GFDL model

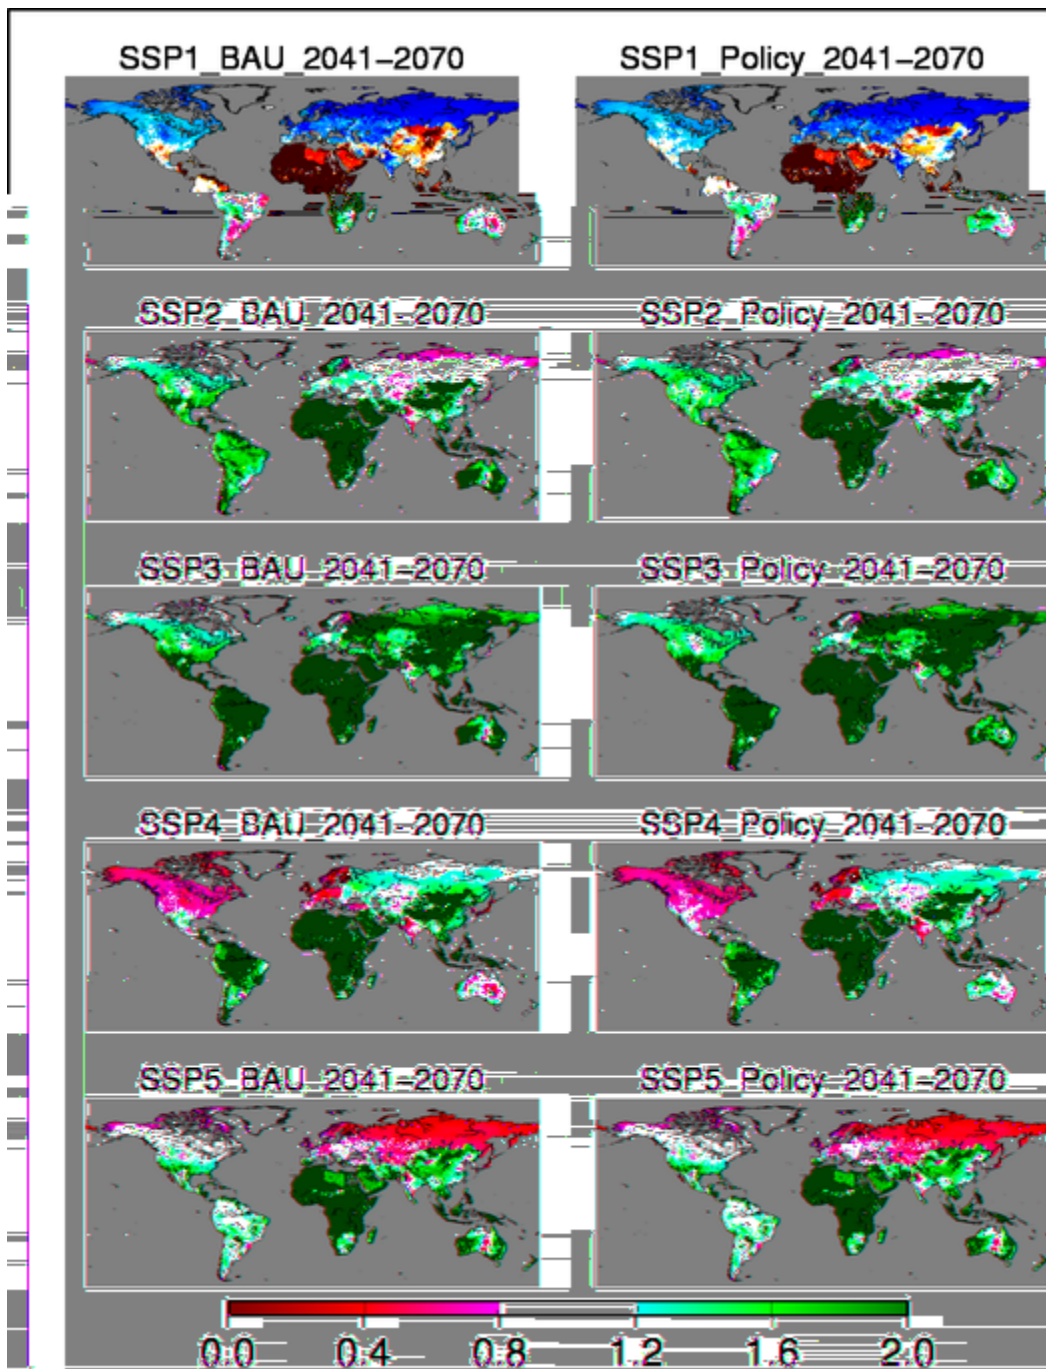

Figure S21 Figure A1 for the HadGEM model

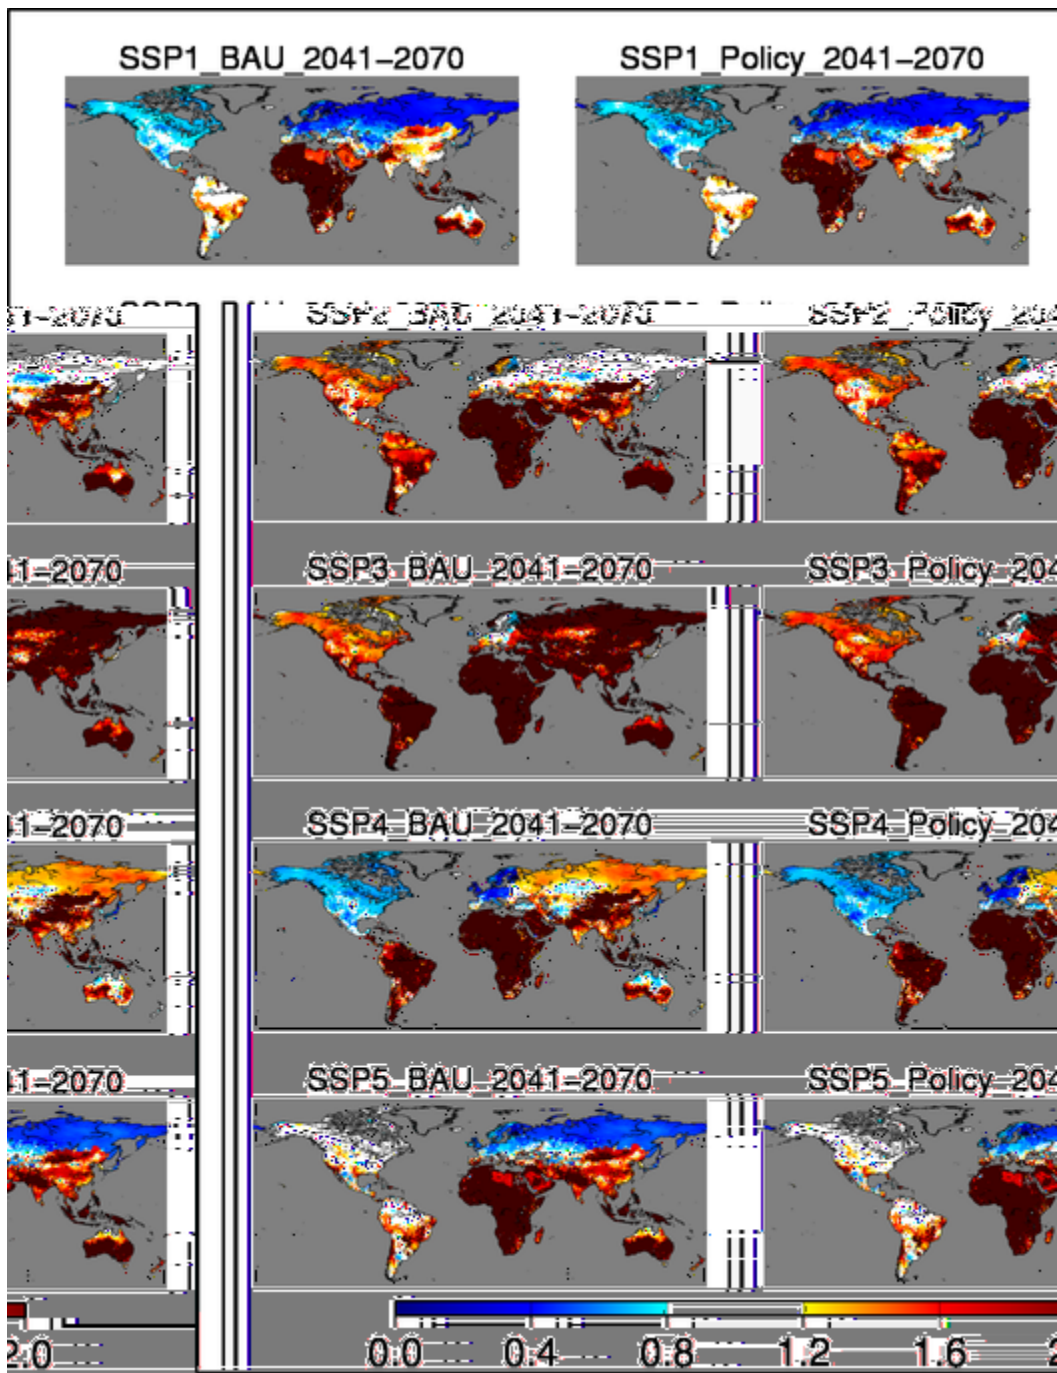

Figure S22 Figure A1 for the GFDL model
